# Supplementary material for: Multi environment Evaluation of Three-Way Cross Maize (Zea mays L.) Hybrids for Fall Armyworm (Spodoptera frugiperda) Resistance and Grain Yield- Performance and Stability
Source: Research Square preprint supplement (doi:10.21203/rs.3.rs-6921383/v1), 2025-06-25
Supplement: Supplementary file 1 [file 35807709e3cad6f4d0a0f53e.xlsx]

## Sheet: Supplementary Table S1
List of maize genotypes evaluated for grain yield and tolerance to fall armyworm (FAW) across locations over two years
Order	Name	Pedigree	Year	Origin	Genotype Role
1	CKHFAW180229	(CKDHL166075/CKDHL164271)//CKSPL10007	Year 1	CIMMYT Kenya	Experimental
2	CKHFAW180294	(CKDHL166075/CKDHL164271)//CKSBL10008	Year 1 and 2	CIMMYT Kenya	Experimental
3	CKHFAW180299	(CML543/CML566)//CKSBL10008	Year 1	CIMMYT Kenya	Experimental
4	CKHFAW180333	(CKDHL166075/CKDHL164271)//CKIR04005	Year 1	CIMMYT Kenya	Experimental
5	CKHFAW190042	(CKLTI0344/CKDHL166068)//CML334	Year 1	CIMMYT Kenya	Experimental
6	CKHFAW190048	(CKDHL164288/CKDHL164260)//CML334	Year 1	CIMMYT Kenya	Experimental
7	CKHFAW190053	(CML567/CKDHL166075)//CML334	Year 1	CIMMYT Kenya	Experimental
8	CKHFAW190090	(CKDHL164260/CKDHL166062)//CKDHL121320	Year 1	CIMMYT Kenya	Experimental
9	CKHFAW190123	(CML312/CKDHL166068)//CML370	Year 1	CIMMYT Kenya	Experimental
10	CKHFAW190125	(CML312/CKDHL164290)//CML370	Year 1	CIMMYT Kenya	Experimental
11	CKHFAW190126	(CKLTI0344/CKDHL164260)//CML370	Year 1	CIMMYT Kenya	Experimental
12	CKHFAW190130	(WMA2001/CKDHL164260)//CML370	Year 1 and 2	CIMMYT Kenya	Experimental
13	CKHFAW190132	(WMA2001/CKDHL120566)//CML370	Year 1	CIMMYT Kenya	Experimental
14	CKHFAW190140	(CML567/CKDHL164290)//CML370	Year 1 and 2	CIMMYT Kenya	Experimental
15	CKHFAW190144	(CML488/CKDHL120566)//CML346	Year 1	CIMMYT Kenya	Experimental
16	CKHFAW190146	(CKDHL164260/CKDHL166062)//CML346	Year 1 and 2	CIMMYT Kenya	Experimental
17	CKHFAW190147	(CML567/CKDHL166068)//CML346	Year 1 and 2	CIMMYT Kenya	Experimental
18	CKHFAW190152	(CML312/CKDHL166068)//CML346	Year 1 and 2	CIMMYT Kenya	Experimental
19	CKHFAW190153	(CML312/CKDHL121288)//CML346	Year 1	CIMMYT Kenya	Experimental
20	CKHFAW190156	(CKLTI0344/CKDHL166068)//CML346	Year 1	CIMMYT Kenya	Experimental
21	CKHFAW190162	(CKDHL164288/CKDHL164260)//CML346	Year 1 and 2	CIMMYT Kenya	Experimental
22	CKHFAW190165	(CKDHL164260/CKDHL120566)//CML346	Year 1 and 2	CIMMYT Kenya	Experimental
23	CKHFAW190168	(CML567/CKDHL164271)//CML346	Year 1	CIMMYT Kenya	Experimental
24	CKHFAW190171	(CKDHL166062/CKDHL121288)//CML346	Year 1	CIMMYT Kenya	Experimental
25	CKHFAW190189	(WMA2001/CKDHL166068)//CKDHL120668	Year 1	CIMMYT Kenya	Experimental
26	CKHFAW190261	(CKDHL164288/CKDHL166068)//CKDHL166092	Year 1 and 2	CIMMYT Kenya	Experimental
27	CKHFAW190270	(CML312/CKDHL164290)//CKDHL166092	Year 1 and 2	CIMMYT Kenya	Experimental
28	CKHFAW190271	(CKLTI0344/CKDHL164260)//CKDHL166092	Year 1	CIMMYT Kenya	Experimental
29	CKHFAW190275	(WMA2001/CKDHL164260)//CKDHL166092	Year 1 and 2	CIMMYT Kenya	Experimental
30	CKHFAW190282	(CKDHL164260/CKDHL164271)//CKDHL166092	Year 1 and 2	CIMMYT Kenya	Experimental
31	CKHFAW190299	(CML312/CKDHL164290)//CKDHL120348	Year 2	CIMMYT Kenya	Experimental
32	CKHFAW190349	(CKDHL164260/CKDHL166062)//CKIR04005	Year 1 and 2	CIMMYT Kenya	Experimental
33	CKHFAW190351	(CKLMARSI0183/CKDHL166062)//CKIR04005	Year 1	CIMMYT Kenya	Experimental
34	CKHFAW190357	(CML312/CKDHL164290)//CKIR04005	Year 1	CIMMYT Kenya	Experimental
35	CKHFAW190371	(CML567/CKDHL164271)//CKIR04005	Year 1	CIMMYT Kenya	Experimental
36	CKHFAW190374	(CKDHL166062/CKDHL121288)//CKIR04005	Year 1	CIMMYT Kenya	Experimental
37	CKHFAW190386	(CKDHL120348/CKDHL166087)//CKDHL166068	Year 1	CIMMYT Kenya	Experimental
38	CKHFAW190399	(CKDHL121320/CML494)//CKLTI0348	Year 1 and 2	CIMMYT Kenya	Experimental
39	CKHFAW190411	(CML566/CKDHL166087)//CKSBL10008	Year 2	CIMMYT Kenya	Experimental
40	CKHFAW190421	(CKDHL120348/CKDHL120668)//CKSBL10021	Year 1 and 2	CIMMYT Kenya	Experimental
41	CKHFAW190422	(CKDHL120348/CKDHL166087)//CKSBL10021	Year 1	CIMMYT Kenya	Experimental
42	CKHFAW190423	(CKDHL120348/CKDHL166091)//CKSBL10021	Year 1	CIMMYT Kenya	Experimental
43	CKHFAW190426	(CKDHL121320/CML494)//CKSBL10021	Year 1	CIMMYT Kenya	Experimental
44	CKHFAW190429	(CML566/CKDHL166087)//CKSBL10025	Year 1	CIMMYT Kenya	Experimental
45	CKHFAW190433	(CKDHL120348/CKDHL166092)//CKSBL10025	Year 1	CIMMYT Kenya	Experimental
46	CKHFAW190435	(CKDHL121320/CML494)//CKSBL10025	Year 1	CIMMYT Kenya	Experimental
47	CKHFAW190436	(CKDHL166087/CKLMLN140377)//CKSBL10025	Year 1	CIMMYT Kenya	Experimental
48	CKHFAW190456	(CML566/CKDHL166087)//CML463	Year 1 and 2	CIMMYT Kenya	Experimental
49	CKHFAW190465	(CML566/CKDHL166087)//CML484	Year 1	CIMMYT Kenya	Experimental
50	CKHFAW190471	(CKDHL121320/CML494)//CML484	Year 1 and 2	CIMMYT Kenya	Experimental
51	CKHFAW190472	(CKDHL166087/CKLMLN140377)//CML484	Year 1	CIMMYT Kenya	Experimental
52	CKHFAW190474	(CML566/CKDHL166087)//CML372	Year 1 and 2	CIMMYT Kenya	Experimental
53	CKHFAW190477	(CKDHL120348/CKDHL166091)//CML372	Year 1	CIMMYT Kenya	Experimental
54	CKHFAW190481	(CKDHL166087/CKLMLN140377)//CML372	Year 1	CIMMYT Kenya	Experimental
55	CKHFAW190489	(CKDHL121320/CML494)//CML22	Year 1 and 2	CIMMYT Kenya	Experimental
56	CKHFAW190490	(CKDHL166087/CKLMLN140377)//CML22	Year 1	CIMMYT Kenya	Experimental
57	CKHFAW190496	(CKDHL120348/CKDHL166092)//CML334	Year 1	CIMMYT Kenya	Experimental
58	CKHFAW190498	(CKDHL121320/CML494)//CML334	Year 1	CIMMYT Kenya	Experimental
59	CKHFAW190499	(CKDHL166087/CKLMLN140377)//CML334	Year 1	CIMMYT Kenya	Experimental
60	CKHFAW190507	(CKDHL121320/CML494)//CML464	Year 1	CIMMYT Kenya	Experimental
61	CKHFAW190519	(CML566/CKDHL166087)//CKDHL166062	Year 1 and 2	CIMMYT Kenya	Experimental
62	CKHFAW190521	(CKDHL120348/CKDHL166087)//CKDHL166062	Year 1	CIMMYT Kenya	Experimental
63	CKHFAW190529	(CKDHL120348/CKDHL166087)//CKDHL164271	Year 1 and 2	CIMMYT Kenya	Experimental
64	CKHFAW190541	(CKDHL121320/CKDHL166091)//CKDHL164290	Year 1	CIMMYT Kenya	Experimental
65	CKHFAW190548	(CKDHL120348/CKDHL166091)//CKDHL164260	Year 1	CIMMYT Kenya	Experimental
66	CKHFAW190552	(CKDHL166087/CKLMLN140377)//CKDHL164260	Year 1 and 2	CIMMYT Kenya	Experimental
67	CKHFAW200001	CML574W/CML566	Year 2	CIMMYT Kenya	Experimental
68	CKHFAW200023	(CKDHL121320/CML494)//CML574W	Year 2	CIMMYT Kenya	Experimental
69	CKHFAW200026	(CKDHL164260/CKDHL166062)//CML574W	Year 2	CIMMYT Kenya	Experimental
70	CKHFAW200031	(CKDHL166062/CKDHL164271)//CML574W	Year 2	CIMMYT Kenya	Experimental
71	CKHFAW200034	(CKLMARSI0183/CKDHL166068)//CML574W	Year 2	CIMMYT Kenya	Experimental
72	CKHFAW200036	(CKLTI0344/CKDHL166068)//CML574W	Year 2	CIMMYT Kenya	Experimental
73	CKHFAW200049	(CKDHL166075/CKDHL164271)//CML574W	Year 2	CIMMYT Kenya	Experimental
74	CKHFAW200050	(CKSBL10026/CML444)//CML574W	Year 2	CIMMYT Kenya	Experimental
75	CKIR06001	(CKSBL10026/CML444)//CKIR04005	Year 1	CIMMYT Kenya	Experimental OPV
76	DK777	Commercial check	Year 1 and 2	Bayer	Commercial check
77	Duma 43	Commercial check	Year 1 and 2	Seedco	Commercial check
78	PHB30G19	Commercial check	Year 1	Pioneer seeds	Commercial check
79	WE3106	Commercial check	Year 2	CIMMYT Kenya seed systems	Commercial check
80	CKH191219	.	Year 1	CIMMYT Kenya	Experimental
81	CKH191220	.	Year 1	CIMMYT Kenya	Experimental
82	CKH191257	.	Year 1	CIMMYT Kenya	Experimental
83	CKH191274	.	Year 1	CIMMYT Kenya	Experimental
84	CKH191275	.	Year 1	CIMMYT Kenya	Experimental
List of Parental lines used to form experimental genotypes
SN	Name		Grain colour	Adaptability or attributes	Role in experimental hybrid formation
1	CKDHL120348	DH Line	White	FAW tolerant	Female parent in formation single cross parent
2	CKDHL120566	DH Line	White	FAW tolerant	Male parent in formation single cross parent
3	CKDHL120668	DH Line	White	FAW tolerant	Male parent in formation single cross parent
4	CKDHL121288	DH Line	White	FAW tolerant	Male parent in formation single cross parent
5	CKDHL121320	DH Line	White	FAW tolerant	Male parent in formation of three-way hybrids
6	CKDHL164260	DH Line	White	FAW tolerant	Female parent in formation single cross parent
7	CKDHL164271	DH Line	White	FAW tolerant	Male parent in formation single cross parent
8	CKDHL164288	DH Line	White	FAW tolerant	Female parent in formation single cross parent
9	CKDHL164290	DH Line	White	FAW tolerant	Male parent in formation single cross parent
10	CKDHL166062	DH Line	White	FAW tolerant	Female parent in formation single cross parent
11	CKDHL166068	DH Line	White	FAW tolerant	Male parent in formation single cross parent
12	CKDHL166075	DH Line	White	FAW tolerant	Female parent in formation single cross parent
13	CKDHL166087	DH Line	White	FAW tolerant	Female parent in formation single cross parent
14	CKDHL166091	DH Line	White	FAW tolerant	Male parent in formation single cross parent
15	CKDHL166092	DH Line	White	FAW tolerant	Male parent in formation single cross parent
16	CKIR04005	Open pollinated variety (OPV)	White	Multiple insect tolerance	Male parent in formation of three-way hybrids
17	CKLMARSI0183	Inbred line	White	Intermediate maturity	Female parent in formation single cross parent
18	CKLMLN140377	Inbred line	White	MLN tolerant	Male parent in formation single cross parent
19	CKLTI0344	Inbred line	White	Intermediate maturity, temperate introgressed inbred line	Female parent in formation single cross parent
20	CKLTI0348	Inbred line	White	Temperate introgressed inbred line	Male parent in formation of three-way hybrids
21	CKSBL10008	Inbred line	White	Early maturity, tolerance to FAW; Tolearnt to TLB, GLS, Common Rust	Male parent in formation of three-way hybrids
22	CKSBL10021	Inbred line	White	Stem borer tolerance, FAW tolerance	Male parent in formation of three-way hybrids
23	CKSBL10025	Inbred line	White	Stem borer tolerance, FAW tolerance	Male parent in formation of three-way hybrids
24	CKSBL10026	Inbred line	White	Stem borer tolerance, FAW tolerance	Female parent in formation single cross parent
25	CKSPL10007	Inbred line	White	MLN tolerance, FAW tolerance,	Male parent in formation of three-way hybrids
26	CML22	Inbred line	White	Tolerance to FAW	Male parent in formation of three-way hybrids
27	CML312	Inbred line	White	Intermediate maturity, subtropical	Female parent in formation single cross parent
28	CML334	Inbred line	White	Early subtropical, tolerant to Southwest Corn borer and FAW	Male parent in formation of three-way hybrids
29	CML346	Inbred line	White	Lowland, tolerant to sugarcane borer and FAW	Male parent in formation of three-way hybrids
30	CML370	Inbred line	White	Intermediate maturity, subtropical, tolerant to E. turcicum	Male parent in formation of three-way hybrids
31	CML372	Inbred line	White	Intermediate maturity, subtropical	Male parent in formation of three-way hybrids
32	CML444	Inbred line	White	Late maturity, Africa mid altitude/subtropical	Male parent in formation single cross parent
33	CML463	Inbred line	White	Transition	Male parent in formation of three-way hybrids
34	CML464	Inbred line	White	Transition	Male parent in formation of three-way hybrids
35	CML484	Inbred line	White	Late maturity, subtropical	Male parent in formation of three-way hybrids
36	CML488	Inbred line	White	Intermediate maturity, Africa Mid-altitude/subtropical	Female parent in formation single cross parent
37	CML494	Inbred line	White	Intermediate maturity, MLN tolerant	Male parent in formation single cross parent
38	CML543	Inbred line	White	Late maturity, Africa mid altitude/subtropical, Tolerant to to E. turcicum, MSV and GLS,	Female parent in formation single cross parent
39	CML566	DH Line (CKDHL0089)	White	Late maturity, Drought tolerant, MLN tolerant	Male and Female parent in formation single cross parent
40	CML567	DH Line	White	Intermediate maturity, drought and FAW tolerance	Female parent in formation single cross parent
41	CML574W	Inbred line	White	Tolerance to FAW, MLN, tar spot complex and drought	Male parent in formation of three-way hybrids
42	WMA2001	Inbred line	White	Drought tolerant	Female parent in formation single cross parent

## Sheet: Supplementary Table S2
			Performance of Genotypes for Grain Yield and Agronomic Traits Over Two Years Under Artificial Infestation of Fall Armyworm (FAW)
		GY	GYs	AD	ADs	ASI	ASIs	EA	EAs	FD1	FD1s	FD2	FD2s	FD3	FD3s	ED	EDs	EPP	EPPs	ER	ERs	EPH	EPHs	PA	PAs	PH	PHs	MOI	MOIs
Order	Genotype	(t/ha)		days		days			(1-5)				(Scale 1-9)					#		%		ratio				cm		%
1	CKHFAW180229	4.67573	0.426826	60.7677	0.853369	2.69233	0.434995	2.12391	0.324002	3.37551	0.289035	5.84222	0.317047	4.77372	0.305436	2.13938	0.336803	0.947418	0.1857	8.12331	1.97637	0.35576	0.0937487	2.77385	0.327994	279.068	4.94101	14.6532	0.399872
2	CKHFAW180294	4.73626	0.394006	60.2666	0.416261	2.48048	0.39104	2.24411	0.318853	3.09566	0.286107	5.60916	0.3062	4.62254	0.293859	2.17289	0.308393	1.11361	0.185446	7.05955	1.11795	0.477301	0.0934317	2.97162	0.317825	282.683	3.09981	14.9495	0.358394
3	CKHFAW180299	4.92128	0.426837	61.2934	0.85337	2.46419	0.435012	1.96773	0.324013	3.32332	0.289038	5.83116	0.317052	4.43829	0.305442	2.21023	0.336803	0.735651	0.18574	8.00303	1.97637	0.545412	0.0937491	3.10504	0.327998	278.563	4.94197	15.1545	0.399873
4	CKHFAW180333	4.65202	0.426838	60.8707	0.85337	2.7984	0.435013	2.34934	0.324014	3.16471	0.289038	5.72417	0.317052	4.81444	0.305442	2.21278	0.336803	0.93216	0.185741	8.26396	1.97637	0.60051	0.0937491	2.70056	0.327998	272.961	4.94198	14.7669	0.399873
5	CKHFAW190042	4.44718	0.426825	61.4974	0.853369	3.4872	0.434994	2.25665	0.324002	3.41576	0.289035	5.9787	0.317047	4.5955	0.305436	2.20602	0.336803	-0.0434447	0.185697	8.27737	1.97637	0.355838	0.0937486	2.96742	0.327994	283.767	4.94089	14.988	0.399872
6	CKHFAW190048	4.36985	0.426825	61.735	0.853369	3.34411	0.434995	2.43752	0.324002	3.53826	0.289035	5.85799	0.317047	4.7411	0.305436	2.1498	0.336803	-0.0560052	0.1857	7.99383	1.97637	0.411463	0.0937487	2.96444	0.327994	282.875	4.941	14.8541	0.399872
7	CKHFAW190053	4.79352	0.427286	61.5014	0.853441	2.95379	0.435599	2.36367	0.324395	3.35443	0.289195	5.83724	0.317266	4.46818	0.305631	2.28478	0.336826	0.885204	0.187055	8.284	1.97637	0.382212	0.09378	3.00559	0.328185	285.004	4.96113	14.9622	0.399935
8	CKHFAW190090	4.48308	0.426839	61.5316	0.85337	3.25203	0.435015	2.37246	0.324015	3.33452	0.289038	5.88846	0.317053	4.84749	0.305443	2.16172	0.336803	0.470631	0.185746	8.10878	1.97637	0.589457	0.0937491	3.13599	0.327999	284.605	4.94218	14.7417	0.399873
9	CKHFAW190123	4.61768	0.426825	61.1115	0.853369	2.77907	0.434995	2.1874	0.324002	3.31546	0.289035	5.74983	0.317047	4.51561	0.305436	2.18717	0.336803	0.794235	0.185699	8.02849	1.97637	0.287965	0.0937487	2.86653	0.327994	286.15	4.94096	14.8237	0.399872
10	CKHFAW190125	4.73871	0.426825	60.9883	0.853369	2.65278	0.434994	2.26645	0.324002	3.45957	0.289035	5.99512	0.317047	4.48913	0.305436	2.20491	0.336803	0.992122	0.185697	8.07251	1.97637	0.382172	0.0937486	2.93845	0.327994	280.434	4.94089	14.8833	0.399872
11	CKHFAW190126	4.4808	0.426837	60.8621	0.85337	2.73781	0.435012	2.44702	0.324013	3.45264	0.289038	5.91135	0.317052	4.72786	0.305442	2.18968	0.336803	0.907727	0.185738	8.03586	1.97637	0.191106	0.0937491	2.8378	0.327998	281.843	4.94187	15.013	0.399873
12	CKHFAW190130	4.85813	0.393621	59.758	0.416097	2.54181	0.390662	2.09029	0.318641	3.11837	0.286024	5.64217	0.306039	4.61408	0.293764	2.09565	0.308359	1.06377	0.184816	6.79117	1.11795	0.302703	0.0934164	2.5044	0.317719	275.616	3.07727	14.9123	0.358311
13	CKHFAW190132	4.93642	0.426827	60.8757	0.853369	2.57859	0.434997	2.10373	0.324004	3.27055	0.289036	5.70993	0.317048	4.44364	0.305437	2.13096	0.336803	0.814181	0.185705	7.9279	1.97637	0.396188	0.0937487	2.94995	0.327994	275.858	4.94122	14.983	0.399872
14	CKHFAW190140	4.85158	0.393981	60.3946	0.4163	2.60003	0.390939	2.15381	0.318723	3.28991	0.28604	5.62099	0.306186	4.35386	0.293779	2.19603	0.308405	0.827563	0.184895	8.05876	1.11795	0.440653	0.0934176	3.02783	0.317755	282.307	3.10235	15.1512	0.358417
15	CKHFAW190144	4.52988	0.426825	61.1763	0.853369	2.7406	0.434994	2.31858	0.324001	3.42095	0.289035	5.75839	0.317047	4.66449	0.305436	2.16582	0.336803	0.717585	0.185697	7.94663	1.97637	0.575157	0.0937486	2.87214	0.327993	274.846	4.94087	14.8036	0.399872
16	CKHFAW190146	4.75158	0.393956	61.4564	0.416296	2.68383	0.390901	2.11598	0.318702	3.40426	0.286036	5.79567	0.306176	4.52632	0.293768	2.10084	0.308405	1.04376	0.184818	9.27382	1.11795	0.444054	0.0934167	2.85108	0.317746	278.036	3.09954	14.7577	0.358415
17	CKHFAW190147	4.60119	0.393637	60.9822	0.416104	2.71066	0.390673	2.20841	0.318642	3.37268	0.286024	5.70738	0.306051	4.58333	0.293763	2.01332	0.30836	0.740484	0.184811	7.30223	1.11795	0.503588	0.0934164	2.94707	0.317719	273.263	3.07904	14.8692	0.358314
18	CKHFAW190152	4.88812	0.393785	60.6463	0.416193	2.33573	0.390748	2.05622	0.318679	3.43133	0.286032	5.62792	0.3061	4.35777	0.293771	2.07673	0.308381	0.928775	0.184855	7.99388	1.11795	0.428905	0.093417	2.80006	0.317736	275.681	3.0877	14.8297	0.358361
19	CKHFAW190153	4.66212	0.426837	60.5528	0.85337	2.76472	0.435013	2.26304	0.324013	3.35372	0.289038	5.87605	0.317052	4.76914	0.305442	2.11352	0.336803	0.956193	0.185741	8.01233	1.97637	0.529128	0.0937491	2.81981	0.327998	275.92	4.94195	14.7524	0.399873
20	CKHFAW190156	4.57592	0.426826	60.7409	0.853369	2.5698	0.434995	2.22769	0.324002	3.29663	0.289035	5.71836	0.317047	4.71883	0.305436	2.10121	0.336803	0.829891	0.1857	7.99383	1.97637	0.424843	0.0937487	2.82887	0.327994	276.933	4.94102	14.7191	0.399872
21	CKHFAW190162	5.10314	0.39397	60.1452	0.416298	2.93264	0.390834	1.96801	0.318713	3.36198	0.286038	5.6945	0.306183	4.45541	0.293773	1.93115	0.308405	1.00825	0.184859	5.95204	1.11795	0.428982	0.0934172	2.94819	0.317751	277.506	3.10134	14.5677	0.358416
22	CKHFAW190165	4.74303	0.393774	60.0239	0.416191	2.81591	0.390732	2.13212	0.31867	3.27676	0.286029	5.58544	0.306095	4.45442	0.293766	2.06359	0.30838	0.939504	0.184822	6.85083	1.11795	0.523856	0.0934166	2.88469	0.317732	277.673	3.08659	14.668	0.35836
23	CKHFAW190168	4.71881	0.426826	60.9686	0.853369	2.65777	0.434996	2.12294	0.324003	3.15826	0.289035	5.70685	0.317047	4.7555	0.305437	2.18888	0.336803	0.958997	0.185702	7.97931	1.97637	0.554691	0.0937487	2.86922	0.327994	276.881	4.94109	14.857	0.399872
24	CKHFAW190171	4.67536	0.426825	60.8599	0.853369	2.81215	0.434995	2.20447	0.324002	3.36312	0.289035	5.8665	0.317047	4.72786	0.305436	2.18476	0.336803	0.976012	0.1857	7.9831	1.97637	0.473909	0.0937487	2.96798	0.327994	278.538	4.941	14.8898	0.399872
25	CKHFAW190189	4.68845	0.426825	61.0887	0.853369	2.52273	0.434994	2.10013	0.324001	3.32978	0.289035	5.85003	0.317047	4.84516	0.305436	2.0997	0.336803	1.04964	0.185697	7.84248	1.97637	0.23525	0.0937486	2.63736	0.327994	277.683	4.94088	14.9886	0.399872
26	CKHFAW190261	4.60377	0.393619	62.2386	0.416097	2.37562	0.405311	2.0484	0.318642	3.36388	0.286024	5.98155	0.306036	4.72011	0.293764	2.27595	0.308358	1.06506	0.184821	9.04275	1.11795	0.490785	0.0934164	3.0378	0.317719	269.038	3.07694	15.1154	0.35831
27	CKHFAW190270	4.86869	0.39419	60.2569	0.416367	2.76983	0.391118	2.21459	0.318888	3.36695	0.286114	5.92016	0.306281	4.51758	0.293862	2.31899	0.308417	0.975472	0.185455	8.77829	1.11795	0.455066	0.093432	2.87154	0.31784	275.302	3.11337	14.4745	0.358449
28	CKHFAW190271	4.76142	0.426838	60.7401	0.85337	2.48051	0.435013	2.17776	0.324014	3.30845	0.289038	5.9527	0.317052	4.90746	0.305442	2.28285	0.336803	0.835871	0.185741	8.11445	1.97637	0.410434	0.0937491	2.8099	0.327998	280.428	4.94201	14.8717	0.399873
29	CKHFAW190275	4.79752	0.393615	60.2121	0.416092	2.24315	0.39059	2.14707	0.318649	3.4239	0.286026	5.8522	0.30603	4.68109	0.29377	2.27955	0.308357	0.866498	0.184857	8.59845	1.11795	0.548397	0.0934168	2.60186	0.317722	272.418	3.07653	14.6623	0.358308
30	CKHFAW190282	4.72279	0.393662	60.2047	0.41611	2.41265	0.390701	1.98792	0.318656	3.45186	0.286027	5.97128	0.306066	4.6582	0.293769	2.10074	0.308362	0.920985	0.184853	7.01042	1.11795	0.518315	0.0934169	3.12714	0.317724	285.463	3.08235	15.0099	0.358317
31	CKHFAW190299	4.78426	0.426583	61.2635	0.586862	2.39489	0.480013	2.15338	0.33926	3.33697	0.315668	5.75907	0.330535	4.58615	0.328361	2.09287	0.324294	0.852401	0.310935	7.88216	1.256	0.504649	0.310312	2.984	0.350023	279.575	4.48827	14.9982	0.387848
32	CKHFAW190349	5.035	0.39363	60.4083	0.416101	2.86565	0.390666	2.16347	0.318643	3.40904	0.286024	5.77246	0.306045	4.51065	0.293764	2.08354	0.30836	1.07133	0.184821	7.80562	1.11795	0.431595	0.0934164	3.06801	0.317719	280.361	3.07848	14.7544	0.358312
33	CKHFAW190351	4.6219	0.426838	60.8597	0.85337	2.29167	0.435013	2.14382	0.324014	3.2929	0.289038	5.85822	0.317052	4.54444	0.305442	2.15686	0.336803	0.899752	0.185741	7.91763	1.97637	0.357655	0.0937491	2.81293	0.327998	277.175	4.94198	14.7348	0.399873
34	CKHFAW190357	4.75062	0.426837	60.5509	0.85337	2.54341	0.435012	2.24464	0.324013	3.284	0.289038	5.7384	0.317052	4.78242	0.305442	2.17491	0.336803	0.81163	0.185738	7.89804	1.97637	0.453547	0.0937491	2.94414	0.327998	277.287	4.94183	14.8457	0.399873
35	CKHFAW190371	4.81008	0.426825	60.8757	0.853369	2.55766	0.434995	2.21819	0.324002	3.38203	0.289035	5.90666	0.317047	4.58478	0.305436	2.12837	0.336803	1.02782	0.185699	7.90571	1.97637	0.409336	0.0937487	2.83052	0.327994	276.933	4.94096	14.8942	0.399872
36	CKHFAW190374	4.60934	0.426828	61.0743	0.85337	2.75211	0.434998	2.16496	0.324004	3.32219	0.289036	5.77111	0.317048	4.76281	0.305438	2.2162	0.336803	0.941704	0.185708	8.11845	1.97637	0.51508	0.0937487	2.92874	0.327994	277.644	4.94134	14.8391	0.399872
37	CKHFAW190386	4.66841	0.426826	61.945	0.853369	2.32711	0.434996	2.29861	0.324003	3.27553	0.289035	5.89707	0.317047	4.74413	0.305437	2.19422	0.336803	0.613832	0.185702	8.07673	1.97637	0.564467	0.0937487	3.06387	0.327994	280.604	4.94111	15.165	0.399872
38	CKHFAW190399	5.1023	0.393968	60.1846	0.416298	2.24376	0.39092	2.19381	0.318712	3.31256	0.286038	5.78605	0.306181	4.92716	0.293773	2.38827	0.308405	0.98115	0.184856	9.93817	1.11795	0.393706	0.0934172	3.03362	0.317751	290.006	3.10088	14.7385	0.358416
39	CKHFAW190411	5.08163	0.426715	61.0282	0.586926	2.41308	0.48006	2.0307	0.339284	3.32688	0.315673	5.83278	0.330581	4.71155	0.328362	2.05709	0.324314	0.856649	0.310935	6.80131	1.256	0.504702	0.310312	2.91999	0.350035	279.355	4.49383	15.2641	0.387893
40	CKHFAW190421	4.95532	0.393773	60.6687	0.416191	2.69534	0.390731	2.2114	0.318669	3.25303	0.286029	5.91398	0.306094	4.66365	0.293766	2.19501	0.30838	0.938749	0.184819	8.83435	1.11795	0.593264	0.0934165	2.98096	0.317732	283.457	3.08633	14.6619	0.35836
41	CKHFAW190422	4.42547	0.427041	61.4749	0.853404	2.55433	0.435274	2.23891	0.324184	3.19126	0.289113	5.74219	0.31715	4.87955	0.305526	2.07742	0.336814	0.942561	0.186326	7.90263	1.97637	0.667331	0.0937638	2.95173	0.328084	277.174	4.94949	14.8018	0.399903
42	CKHFAW190423	4.64812	0.426838	61.4824	0.85337	2.63042	0.435014	2.13521	0.324014	3.41148	0.289038	5.81599	0.317053	4.60129	0.305443	2.11017	0.336803	0.880618	0.185744	7.89067	1.97637	0.66097	0.0937491	3.05462	0.327998	281.484	4.94209	14.8203	0.399873
43	CKHFAW190426	4.71586	0.427041	61.3861	0.853404	2.58726	0.435274	2.10379	0.324184	3.30374	0.289113	5.90868	0.31715	4.71212	0.305526	2.08571	0.336814	0.960183	0.186326	7.81221	1.97637	0.647542	0.0937638	3.15918	0.328084	282.294	4.94951	15.0354	0.399903
44	CKHFAW190429	4.50439	0.427286	61.6095	0.853441	2.55027	0.435599	2.24877	0.324395	3.40644	0.289195	5.90208	0.317266	4.76738	0.305631	2.19368	0.336826	0.664689	0.187055	7.93436	1.97637	0.632999	0.09378	3.1223	0.328185	281.769	4.96113	14.8865	0.399935
45	CKHFAW190433	4.75717	0.427044	62.0207	0.853404	2.42879	0.435279	2.03132	0.324187	3.34626	0.289113	5.74862	0.317151	4.69245	0.305528	2.16328	0.336814	0.973722	0.186336	7.95257	1.97637	0.71292	0.0937639	3.14967	0.328085	281.922	4.95003	14.9409	0.399903
46	CKHFAW190435	4.66906	0.426837	61.7306	0.85337	2.69889	0.435013	2.28912	0.324013	3.34698	0.289038	5.89724	0.317052	4.88004	0.305442	2.20395	0.336803	0.81253	0.18574	8.13367	1.97637	0.709885	0.0937491	3.2633	0.327998	281.986	4.94194	14.7866	0.399873
47	CKHFAW190436	4.68558	0.427042	61.6053	0.853404	2.46331	0.435276	2.2463	0.324185	3.35073	0.289113	5.86934	0.31715	4.81205	0.305527	2.11292	0.336814	0.848418	0.186329	7.92678	1.97637	0.62133	0.0937638	3.0631	0.328085	281.227	4.94966	14.9271	0.399903
48	CKHFAW190456	4.79543	0.393862	62.2148	0.416171	2.50905	0.390974	2.12494	0.318826	3.51569	0.286102	5.93022	0.30615	4.74598	0.293857	2.32332	0.308372	0.93645	0.185442	10.8007	1.11795	0.556618	0.0934316	3.09936	0.317812	285.528	3.09157	14.9071	0.358346
49	CKHFAW190465	4.60822	0.426837	61.3868	0.85337	2.35748	0.435012	2.25443	0.324013	3.4303	0.289038	5.88986	0.317052	4.53677	0.305442	2.26139	0.336803	0.876924	0.185738	8.14755	1.97637	0.565098	0.0937491	2.84475	0.327998	277.168	4.94185	14.7988	0.399873
50	CKHFAW190471	4.39263	0.393608	61.5958	0.416093	2.40362	0.390659	2.15961	0.318639	3.43246	0.286024	5.76534	0.306029	4.49084	0.293764	2.07404	0.308358	0.997893	0.184815	6.25026	1.11795	0.615742	0.0934164	2.9424	0.317718	278.033	3.07549	14.6831	0.358308
51	CKHFAW190472	4.69728	0.426825	60.8703	0.853369	2.63565	0.434994	2.14351	0.324001	3.27413	0.289035	5.75476	0.317047	4.78012	0.305436	2.19435	0.336803	0.857678	0.185697	8.05077	1.97637	0.577085	0.0937486	2.99384	0.327994	280.368	4.94088	14.8763	0.399872
52	CKHFAW190474	5.04753	0.39419	61.7837	0.416367	2.5356	0.391123	2.03537	0.318886	3.37159	0.286113	5.95402	0.306284	4.66453	0.293861	2.16009	0.308417	0.957893	0.185444	9.06146	1.11795	0.491868	0.0934319	2.77978	0.31784	273.508	3.11315	15.3987	0.35845
53	CKHFAW190477	4.61744	0.426878	61.4042	0.853374	2.99155	0.435074	2.37859	0.324052	3.30855	0.289045	5.84561	0.317069	4.65746	0.305461	2.32362	0.336804	0.557249	0.18588	8.43638	1.97637	0.57787	0.0937506	3.11219	0.328013	281.592	4.94568	14.8553	0.399875
54	CKHFAW190481	4.63332	0.426826	61.2733	0.853369	2.92946	0.434996	2.193	0.324003	3.32673	0.289035	5.88766	0.317048	4.61481	0.305437	2.25572	0.336803	0.86987	0.185703	8.20722	1.97637	0.506522	0.0937487	2.97049	0.327994	283.056	4.94112	14.8179	0.399872
55	CKHFAW190489	4.9143	0.393625	61.5777	0.4161	2.48962	0.390663	2.01506	0.318641	3.36635	0.286024	5.84708	0.30604	4.57947	0.293763	2.18236	0.308359	0.819353	0.184813	8.18694	1.11795	0.611342	0.0934164	3.19448	0.317719	282.809	3.07734	14.957	0.358312
56	CKHFAW190490	4.82199	0.426827	61.3104	0.853369	2.48042	0.434997	2.2098	0.324004	3.39296	0.289036	5.88956	0.317048	4.80947	0.305437	2.23655	0.336803	0.700057	0.185705	8.14964	1.97637	0.622259	0.0937487	3.06089	0.327994	282.518	4.94123	15.0296	0.399872
57	CKHFAW190496	4.68819	0.426837	62.0272	0.85337	2.73569	0.435012	2.29432	0.324013	3.54412	0.289038	5.96781	0.317052	4.68605	0.305442	2.2147	0.336803	0.829436	0.185738	8.21253	1.97637	0.664473	0.0937491	3.15473	0.327998	281.92	4.94186	14.9912	0.399873
58	CKHFAW190498	4.85952	0.426825	61.8375	0.853369	2.65291	0.434995	2.15079	0.324002	3.37312	0.289035	5.8237	0.317047	4.54558	0.305436	2.12546	0.336803	0.753647	0.1857	8.07739	1.97637	0.562965	0.0937487	3.19468	0.327994	285.359	4.94099	15.0499	0.399872
59	CKHFAW190499	4.68272	0.426878	61.5772	0.853374	2.89543	0.435074	2.24619	0.324052	3.38174	0.289045	5.88821	0.317069	4.73399	0.305461	2.15695	0.336804	0.64013	0.18588	7.95418	1.97637	0.532014	0.0937506	3.15978	0.328013	284.606	4.94568	15.0251	0.399875
60	CKHFAW190507	4.69565	0.426837	62.0547	0.85337	2.36171	0.435012	2.04142	0.324013	3.46415	0.289038	5.99568	0.317052	4.6914	0.305442	2.09167	0.336803	0.889436	0.185738	7.92946	1.97637	0.588983	0.0937491	2.83271	0.327998	274.482	4.94185	14.7484	0.399873
61	CKHFAW190519	4.85207	0.393854	62.6057	0.416168	2.4806	0.390971	2.1628	0.318825	3.25872	0.286102	5.96102	0.306145	4.67418	0.293857	2.11502	0.308371	0.680914	0.185442	8.38327	1.11795	0.545472	0.0934316	2.98167	0.317812	273.389	3.09075	15.3704	0.358345
62	CKHFAW190521	4.64698	0.427042	61.8216	0.853404	2.26155	0.435276	2.01651	0.324185	3.45474	0.289113	5.81408	0.31715	4.62398	0.305527	2.10022	0.336814	0.73816	0.186329	7.93423	1.97637	0.636082	0.0937638	2.94639	0.328085	279.458	4.94966	14.965	0.399903
63	CKHFAW190529	4.91115	0.394006	60.713	0.416262	3.37258	0.391039	2.17443	0.318853	3.43947	0.286107	5.90813	0.306201	4.80462	0.293859	2.38404	0.308393	0.827465	0.185443	10.4197	1.11795	0.688017	0.0934317	3.26607	0.317825	283.433	3.09974	14.9678	0.358394
64	CKHFAW190541	4.61556	0.427042	61.1585	0.853404	2.98511	0.435275	2.32764	0.324185	3.37164	0.289113	5.89222	0.31715	4.83871	0.305527	2.23039	0.336814	0.769737	0.186329	8.16095	1.97637	0.557482	0.0937638	3.05934	0.328085	280.051	4.94965	14.684	0.399903
65	CKHFAW190548	4.52786	0.427286	61.0688	0.853441	2.44939	0.435599	2.24877	0.324395	3.46885	0.289195	5.93699	0.317266	4.75028	0.305631	2.19789	0.336826	0.995462	0.187055	8.00528	1.97637	0.455973	0.09378	2.88888	0.328185	283.387	4.96113	14.6519	0.399935
66	CKHFAW190552	5.23577	0.393772	60.3347	0.416191	2.4437	0.390734	2.00509	0.318668	3.66141	0.286029	5.9142	0.306094	4.56728	0.293765	2.14207	0.30838	0.958336	0.184814	7.69066	1.11795	0.487018	0.0934165	3.20541	0.317732	293.71	3.08611	14.9118	0.35836
67	CKHFAW200001	4.57557	0.426884	62.7688	0.587	2.51244	0.480121	2.12497	0.339315	3.37527	0.315678	5.84974	0.330655	4.59588	0.328364	2.07805	0.324337	0.807176	0.310936	6.25456	1.256	0.502706	0.310312	2.97608	0.350048	282.699	4.50271	15.0889	0.387944
68	CKHFAW200023	4.82633	0.426581	62.1111	0.586862	2.53023	0.480013	2.13679	0.339259	3.38042	0.315668	5.73605	0.330533	4.60665	0.328361	2.08084	0.324294	0.852908	0.310935	7.04161	1.256	0.510316	0.310312	3.03347	0.350023	287.524	4.48804	14.9739	0.387848
69	CKHFAW200026	4.88644	0.426559	62.0859	0.586855	2.60859	0.479931	2.10841	0.339255	3.30356	0.315668	5.8071	0.330519	4.65023	0.328361	2.01806	0.324292	0.832573	0.310935	6.13198	1.256	0.506095	0.310312	3.04854	0.350022	285.997	4.48628	14.9374	0.387844
70	CKHFAW200031	4.68985	0.426724	62.073	0.586928	2.62984	0.480067	2.18672	0.339286	3.33432	0.315673	5.81243	0.330588	4.67596	0.328362	2.07407	0.324315	0.825094	0.310935	6.1495	1.256	0.510942	0.310312	3.09246	0.350035	284.522	4.49462	15.0196	0.387894
71	CKHFAW200034	4.69993	0.426557	62.085	0.586854	2.45212	0.47993	2.24696	0.339255	3.39143	0.315667	5.79062	0.330516	4.7252	0.328361	2.22237	0.324291	0.829965	0.310935	8.26255	1.256	0.501673	0.310312	2.97987	0.350022	281.088	4.486	14.8594	0.387844
72	CKHFAW200036	4.5842	0.426716	62.103	0.586926	2.74858	0.480065	2.23741	0.339284	3.35682	0.315673	5.79584	0.330582	4.64611	0.328362	2.31472	0.324314	0.82024	0.310935	9.26751	1.256	0.502435	0.310312	3.02322	0.350035	283.455	4.49388	14.7545	0.387893
73	CKHFAW200049	4.69632	0.426884	61.9428	0.587	2.4422	0.480121	2.12497	0.339315	3.36958	0.315678	5.80807	0.330655	4.6856	0.328364	2.13015	0.324337	0.847266	0.310936	7.24299	1.256	0.508639	0.310312	3.03868	0.350048	281.125	4.50271	14.9115	0.387944
74	CKHFAW200050	4.8804	0.426886	62.0787	0.587001	2.81317	0.480129	2.22757	0.339316	3.38419	0.315679	5.84705	0.330658	4.66936	0.328364	2.09079	0.324337	0.829862	0.310936	6.91805	1.256	0.512814	0.310312	2.92892	0.350048	275.643	4.50313	14.8564	0.387944
75	CKIR06001	4.64056	0.426828	61.0033	0.85337	2.80933	0.434998	2.14918	0.324004	3.18699	0.289036	5.67286	0.317048	4.64294	0.305438	2.17241	0.336803	0.937868	0.185708	7.93406	1.97637	0.603915	0.0937487	2.91712	0.327994	279.736	4.94135	14.9247	0.399872
76	DK777	4.83423	0.393807	61.4279	0.416198	2.13	0.390775	2.19985	0.318692	3.62767	0.286034	6.30949	0.306111	5.14613	0.293777	2.30208	0.308382	0.957553	0.184894	7.95541	1.11795	0.337259	0.0934174	2.52299	0.317741	278.368	3.0902	15.0674	0.358363
77	Duma 43	4.39079	0.393619	59.099	0.416097	3.97362	0.390573	2.46799	0.31864	3.81714	0.286024	6.47451	0.306037	5.229	0.293763	2.95782	0.308359	0.585849	0.184813	14.7477	1.11795	0.239208	0.0934164	2.75752	0.317718	280.379	3.07683	14.2892	0.35831
78	PHB30G19	4.81881	0.426826	61.4238	0.853369	2.97433	0.434995	2.00211	0.324002	3.95895	0.289035	6.22863	0.317047	4.95405	0.305437	2.68544	0.336803	0.379023	0.1857	11.8561	1.97637	0.314503	0.0937487	2.93481	0.327994	280.827	4.94104	15.3977	0.399872
79	WE3106	4.67555	0.426602	60.779	0.586867	2.89067	0.480086	2.1373	0.339263	3.48058	0.315668	6.07832	0.330551	4.86151	0.328361	2.19105	0.324296	0.830903	0.310935	8.07284	1.256	0.48361	0.310312	2.8009	0.350024	281.751	4.49023	14.928	0.387852

## Sheet: Supplmentary Table S3
			Performance of Genotypes for Grain Yield and Agronomic Traits Over Two Years Under Natural Infestation of Fall Armyworm (FAW)
Order	Genotype	GY	GYs	AD	ADs	ASI	ASIs	EA	EAs	FD1	FD1s	FD2	FD2s	FD3	FD3s	BHC	BHCs	EPP	EPPs	ER	ERs	TLB	TLBs	GLS	GLSs	PH	PHs	MOI	MOIs
1	CKHFAW180229	5.03687	0.352622	66.7971	0.487914	1.88235	0.216574	3.18407	0.109699	3.6281	0.179889	4.22005	0.128848	3.7341	0.200324	16.5969	0.912875	0.891677	0.0674756	8.49657	1.56982	1.77768	0.173645	1.45031	0.118075	213.193	2.18956	16.2527	0.374194
2	CKHFAW180294	5.31223	0.113859	66.8009	0.182065	1.29787	0.161354	3.09646	0.0674937	3.40812	0.160676	3.80465	0.106521	3.34024	0.198761	16.4039	0.646058	0.97294	0.0551682	12.2231	0.833566	2.06885	0.131693	1.43599	0.0862958	211.323	1.44625	16.3966	0.207288
3	CKHFAW180299	6.39549	0.352308	70.2942	0.488336	0.923862	0.216574	2.92563	0.109711	3.45964	0.18002	3.95361	0.128898	3.26587	0.200402	8.89014	0.912875	1.08822	0.0674756	8.79859	1.56983	1.71361	0.173652	1.3388	0.118075	218.172	2.19608	17.4806	0.374192
4	CKHFAW180333	4.57445	0.352169	67.4713	0.487928	1.82746	0.216574	3.20167	0.109687	3.30818	0.179943	3.92222	0.128944	3.37522	0.200306	11.6251	0.912875	0.949266	0.0674756	12.0132	1.56983	1.7113	0.173649	1.56241	0.118075	202.363	2.19261	16.5112	0.37417
5	CKHFAW190042	4.74551	0.535845	70.4386	0.829502	1.71311	0.279307	3.11423	0.149453	3.64343	0.213261	4.04362	0.169728	3.3531	0.232171	6.63977	2.98311	0.784545	0.0713273	11.8377	1.60611	NA	NA	1.41598	0.153846	219.365	3.97743	16.6103	0.425995
6	CKHFAW190048	5.24886	0.536036	70.0769	0.82746	1.30524	0.279307	2.95039	0.149458	3.75235	0.213249	4.11847	0.169572	3.60448	0.232219	6.89838	2.98311	0.971284	0.0713273	9.32434	1.6061	NA	NA	1.41522	0.153846	220.625	3.96937	16.707	0.426092
7	CKHFAW190053	5.31856	0.351761	71.7449	0.487226	1.13354	0.216574	3.02805	0.109656	3.6544	0.179935	4.06645	0.128781	3.55845	0.200326	9.78664	0.912875	0.963575	0.0674756	9.86778	1.56983	1.62991	0.173649	1.52623	0.118075	217.211	2.18963	16.8775	0.374157
8	CKHFAW190090	5.55093	0.352498	69.3738	0.487273	1.88771	0.216574	2.81856	0.109636	3.39075	0.179985	3.82486	0.128831	3.12917	0.200437	5.35435	0.912875	0.855024	0.0674756	7.94849	1.5698	1.71497	0.173641	1.2499	0.118072	221.473	2.18445	16.9973	0.37406
9	CKHFAW190123	5.2142	0.352988	68.9432	0.487851	1.59235	0.216574	2.99744	0.109737	3.5522	0.179979	3.95647	0.128894	3.28639	0.200401	13.2281	0.912875	0.93745	0.0674756	10.1601	1.56983	1.6957	0.173649	1.49835	0.118069	218.639	2.18941	16.9945	0.374315
10	CKHFAW190125	5.20248	0.352605	67.6646	0.488392	1.56132	0.216574	2.83341	0.109693	3.61539	0.180072	3.95925	0.128966	3.71956	0.200344	8.19424	0.912875	0.93699	0.0674756	8.955	1.56984	1.63571	0.173647	1.46218	0.118074	218.239	2.19101	16.8239	0.374272
11	CKHFAW190126	4.76177	0.353246	66.7626	0.489149	1.2543	0.216574	2.99879	0.109791	3.4321	0.179976	3.98983	0.128826	3.5195	0.200507	16.0604	0.912875	1.03529	0.0674756	9.88257	1.56982	1.71282	0.173648	1.35961	0.118075	217.178	2.20552	16.4162	0.374304
12	CKHFAW190130	5.40581	0.113906	66.4998	0.182147	1.10741	0.161354	2.87697	0.0675254	3.68603	0.160739	4.15374	0.106564	3.66129	0.198621	12.6774	0.646058	1.1171	0.0551682	8.85336	0.83357	1.69625	0.131697	1.38846	0.0863005	214.298	1.44682	17.0157	0.207311
13	CKHFAW190132	5.37165	0.35169	67.8172	0.486837	1.51415	0.216574	2.80955	0.109644	3.62271	0.179971	4.02883	0.128698	3.43338	0.200386	9.95836	0.912875	1.07378	0.0674756	7.38205	1.56984	1.77482	0.173642	1.40873	0.118072	209.333	2.18308	16.6252	0.374192
14	CKHFAW190140	5.4332	0.113868	66.781	0.182014	1.61347	0.161354	2.87653	0.0675068	3.19765	0.160661	4.03789	0.106553	3.2012	0.198609	8.63087	0.646058	1.01926	0.0551682	7.91066	0.833566	1.50954	0.131692	1.49685	0.0862975	215.465	1.44403	16.9536	0.207294
15	CKHFAW190144	4.4413	0.353471	69.2262	0.487861	1.70809	0.216574	2.95116	0.109716	3.38184	0.18006	3.76442	0.12887	3.24514	0.200431	4.83913	0.912875	1.02181	0.0674756	8.17914	1.56982	1.68425	0.173642	1.58372	0.118074	207.551	2.18509	16.633	0.374197
16	CKHFAW190146	4.90248	0.113873	68.2644	0.181996	1.75455	0.161354	2.85665	0.0675034	3.79697	0.160605	3.98572	0.106365	3.39905	0.198545	4.99429	0.646058	1.02734	0.0551682	6.50602	0.833569	1.91571	0.131694	1.53746	0.0862976	211.148	1.44239	16.6379	0.20729
17	CKHFAW190147	5.11373	0.11385	69.2235	0.181957	1.84251	0.161354	2.90808	0.0675109	3.87451	0.160706	4.08146	0.106498	3.55026	0.198564	4.90654	0.646058	1.09217	0.0551682	7.32753	0.833573	1.71725	0.131692	1.54388	0.0862962	207.605	1.4413	16.5151	0.207297
18	CKHFAW190152	5.10109	0.113867	68.2063	0.181982	1.59779	0.161354	2.83999	0.0675006	3.51944	0.1607	3.95622	0.106456	3.43982	0.198586	5.03905	0.646058	1.0187	0.0551682	8.17762	0.833569	1.69562	0.131694	1.52284	0.0862965	211.984	1.44507	16.7966	0.207315
19	CKHFAW190153	5.19435	0.35296	68.0923	0.486841	1.74341	0.216574	3.06765	0.10969	3.40782	0.179967	3.96134	0.128768	3.69148	0.200335	5.45473	0.912875	0.969055	0.0674756	7.19798	1.56981	1.90815	0.173645	1.43478	0.118077	210.585	2.18549	16.5897	0.374229
20	CKHFAW190156	5.19164	0.352564	67.9832	0.487766	1.22445	0.216574	2.76419	0.10963	3.62915	0.179985	3.98138	0.128921	3.30687	0.200343	5.22629	0.912875	1.01932	0.0674756	8.28468	1.56982	1.99411	0.173646	1.41747	0.118075	206.891	2.18806	16.3248	0.374157
21	CKHFAW190162	5.2031	0.11384	67.0212	0.182109	2.08285	0.161354	2.68714	0.067512	3.59969	0.160611	3.89948	0.106493	3.18917	0.198521	4.62898	0.646058	0.98385	0.0551682	5.9009	0.833582	1.77861	0.131695	1.72885	0.0862964	214.618	1.44409	15.7903	0.207295
22	CKHFAW190165	4.75287	0.113861	66.7869	0.182076	2.39554	0.161354	2.89723	0.0675259	3.45728	0.16066	3.97633	0.106383	3.86647	0.198527	5.89337	0.646058	0.969476	0.0551682	6.82243	0.833582	1.7643	0.131697	1.56196	0.0862962	209.551	1.44336	16.3431	0.20729
23	CKHFAW190168	4.75592	0.352543	67.4408	0.487376	1.66044	0.216574	2.71755	0.109681	3.47324	0.18002	3.88078	0.129025	3.6961	0.200353	5.31846	0.912875	0.960774	0.0674756	9.11746	1.56981	1.48944	0.173644	1.44478	0.118074	205.142	2.18922	16.5146	0.374165
24	CKHFAW190171	4.75656	0.353093	68.8669	0.488117	1.75917	0.216574	3.25253	0.109687	3.36183	0.18001	3.88522	0.128923	3.3142	0.20034	4.19659	0.912875	1.03711	0.0674756	8.02292	1.56982	1.84032	0.173644	1.41105	0.118076	206.471	2.1898	16.7975	0.37419
25	CKHFAW190189	6.2146	0.351734	68.4267	0.487338	0.854647	0.216574	2.81903	0.109622	3.69229	0.179983	4.23542	0.128931	3.5178	0.200413	6.20652	0.912875	1.07048	0.0674756	8.1511	1.5698	1.7901	0.17364	1.32542	0.118074	205.951	2.18782	16.6763	0.374156
26	CKHFAW190261	4.34996	0.113854	70.2436	0.182151	0.962793	0.161354	3.30684	0.0675044	3.85486	0.160661	4.22541	0.106697	3.79243	0.198608	7.88088	0.646058	0.891557	0.0551682	10.0811	0.83357	1.90235	0.131694	1.48543	0.0863005	208.585	1.44418	16.9877	0.207299
27	CKHFAW190270	5.14351	0.113844	67.6752	0.182004	1.45299	0.161354	3.05317	0.0674994	3.89321	0.160662	4.35824	0.10637	3.87778	0.198519	4.8043	0.646058	0.935828	0.0551682	11.4694	0.833585	1.75669	0.131694	1.5118	0.0862963	209.166	1.44379	16.1413	0.207284
28	CKHFAW190271	5.67932	0.35179	66.4885	0.48763	0.966499	0.216574	2.79818	0.109706	3.89389	0.179944	4.22164	0.128988	3.76999	0.200468	5.09697	0.912875	1.07697	0.0674756	10.0148	1.56983	1.77539	0.173646	1.42043	0.118075	211.852	2.18904	16.5047	0.374316
29	CKHFAW190275	5.22492	0.113863	67.0677	0.182107	1.24241	0.161354	2.86076	0.0675082	3.68977	0.160663	4.1865	0.106448	3.5147	0.198556	4.60814	0.646058	0.944499	0.0551682	7.26885	0.833565	1.62397	0.131696	1.34719	0.0862973	204.19	1.44492	16.7182	0.207297
30	CKHFAW190282	5.51198	0.113868	67.1559	0.182263	1.54518	0.161354	2.83473	0.0674984	3.77807	0.160615	4.35151	0.106529	3.92731	0.19857	4.72678	0.646058	1.05909	0.0551682	6.63324	0.833578	1.66825	0.131695	1.2968	0.0862964	213.237	1.44553	16.3011	0.207291
31	CKHFAW190299	6.01274	0.139093	68.3617	0.260944	1.51779	0.213386	2.99104	0.0801756	3.58573	0.200263	3.99412	0.133641	3.50209	0.334427	5.8414	0.984817	1.19965	0.0711532	8.08289	0.912636	1.68125	0.14243	1.43846	0.0992042	222.48	2.46534	16.7341	0.228918
32	CKHFAW190349	4.91808	0.113853	67.7924	0.182051	1.79461	0.161354	3.10382	0.0674987	3.87301	0.160664	4.39586	0.106483	3.59984	0.198611	11.8828	0.646058	0.976241	0.0551682	11.7384	0.833562	1.56635	0.131695	1.42879	0.0862976	214.353	1.44731	16.556	0.207309
33	CKHFAW190351	5.02547	0.535858	68.2872	0.826787	1.23539	0.279307	3.04726	0.149452	3.75151	0.213237	3.80765	0.169504	3.49592	0.232184	6.7741	2.98311	1.02385	0.0713273	8.44143	1.6061	NA	NA	1.43581	0.153846	208.111	3.96603	16.4704	0.426043
34	CKHFAW190357	5.25603	0.535891	68.6562	0.828164	1.66482	0.279307	2.96725	0.149428	3.64475	0.213254	4.14741	0.169607	3.4824	0.232218	6.65344	2.98311	0.896445	0.0713273	9.75205	1.6061	NA	NA	1.4148	0.153846	211.501	3.97539	16.6544	0.426045
35	CKHFAW190371	4.74691	0.352626	69.2148	0.487851	1.27025	0.216574	3.02491	0.109709	3.53973	0.179958	3.99804	0.128768	3.37741	0.200327	9.46596	0.912875	1.01689	0.0674756	9.8763	1.56982	1.63384	0.173647	1.54868	0.118076	209.046	2.19088	16.1989	0.374115
36	CKHFAW190374	4.51596	0.352596	68.4659	0.488426	1.2928	0.216574	3.09817	0.109688	3.4886	0.179992	3.92805	0.129007	3.2393	0.2005	6.80458	0.912875	0.922944	0.0674756	10.4724	1.56982	1.88599	0.173648	1.64775	0.118075	208.668	2.19263	16.3348	0.374136
37	CKHFAW190386	5.7062	0.352245	71.9304	0.488999	0.843963	0.216574	2.98611	0.109678	3.75184	0.18005	4.17341	0.128902	3.76197	0.200392	10.7215	0.912875	1.04148	0.0674756	11.6508	1.56985	1.82484	0.173654	1.46122	0.118077	213.195	2.19676	17.0079	0.374141
38	CKHFAW190399	5.73232	0.127787	68.9079	0.223299	0.914777	0.183423	3.00485	0.0756723	3.70501	0.180616	4.04869	0.122554	3.88799	0.230196	6.33223	0.98322	1.05047	0.0571058	7.45826	0.848665	1.56465	0.142431	1.34552	0.0989993	221.851	2.03177	16.7375	0.216304
39	CKHFAW190411	5.35568	0.139134	68.8473	0.260924	1.10937	0.213386	3.13747	0.0801453	3.60712	0.200154	3.8962	0.133762	3.51106	0.334435	5.66462	0.984817	1.13031	0.0711532	9.18676	0.912661	1.58426	0.142434	1.43066	0.0992114	216.749	2.46713	16.8394	0.228921
40	CKHFAW190421	5.13579	0.113907	68.0359	0.182331	1.83993	0.161354	3.02435	0.0675104	3.48409	0.160797	3.98834	0.106816	3.42281	0.198752	7.21573	0.646058	1.06882	0.0551682	9.76221	0.833563	1.62091	0.131692	1.48113	0.0862995	213.077	1.44602	16.3725	0.207312
41	CKHFAW190422	4.50735	0.352148	69.3182	0.486997	1.74178	0.216574	3.19563	0.109628	3.61708	0.180089	3.99308	0.128895	3.47088	0.200361	4.82593	0.912875	1.1132	0.0674756	8.79973	1.56982	1.71143	0.173639	1.40568	0.118076	209.266	2.18634	17.1297	0.37419
42	CKHFAW190423	4.78531	0.351729	69.128	0.486564	1.34479	0.216574	2.97694	0.109666	3.7313	0.180017	3.90001	0.128804	3.28003	0.200325	5.52134	0.912875	0.957791	0.0674756	8.62685	1.56981	1.63566	0.173646	1.55595	0.118076	216.026	2.18681	16.9122	0.374146
43	CKHFAW190426	5.06213	0.352478	69.5595	0.48715	1.92385	0.216574	3.08692	0.109667	3.65979	0.180016	3.80443	0.128752	3.20053	0.200369	7.04835	0.912875	1.00942	0.0674756	8.56953	1.56984	1.74404	0.173647	1.34787	0.118072	217.171	2.18131	16.8336	0.374157
44	CKHFAW190429	5.74952	0.352106	72.177	0.487326	0.892722	0.216574	3.07319	0.109679	3.61226	0.179964	4.10133	0.128881	3.53637	0.200438	4.43846	0.912875	1.0491	0.0674756	8.11891	1.5698	1.88912	0.173644	1.42373	0.118074	222.399	2.18769	16.7382	0.374171
45	CKHFAW190433	5.51739	0.352672	72.5081	0.488215	1.44837	0.216574	3.02969	0.109713	3.69966	0.18	4.02274	0.128934	3.31013	0.200449	4.01849	0.912875	1.15316	0.0674756	7.63175	1.56982	1.89135	0.173645	1.40542	0.118077	218.041	2.19018	16.5375	0.374233
46	CKHFAW190435	5.33891	0.353882	71.2679	0.48831	1.35124	0.216574	3.00298	0.109718	3.55792	0.180121	4.03358	0.129084	3.37269	0.200384	4.32178	0.912875	1.06184	0.0674756	7.75417	1.56982	1.89003	0.173641	1.34254	0.118074	223.427	2.18548	16.5711	0.37421
47	CKHFAW190436	5.59542	0.352964	70.4819	0.487308	1.23847	0.216574	2.89846	0.109713	3.77178	0.179979	4.15369	0.128808	3.6474	0.20036	4.87395	0.912875	1.04608	0.0674756	9.30868	1.56982	1.89053	0.173644	1.34903	0.118074	224.767	2.18436	16.3538	0.374222
48	CKHFAW190456	6.02554	0.113852	69.6436	0.182147	0.906061	0.161354	2.91572	0.0674967	3.61733	0.160622	4.07071	0.106407	3.73989	0.198572	5.05457	0.646058	0.96364	0.0551682	7.40379	0.833561	1.65795	0.131696	1.56327	0.0862953	220.198	1.44493	16.449	0.207298
49	CKHFAW190465	5.31337	0.353044	70.5968	0.487587	0.851301	0.216574	3.00011	0.109729	3.67235	0.179954	3.97467	0.128727	3.24911	0.200326	4.42726	0.912875	0.881627	0.0674756	8.66827	1.56981	1.62164	0.173642	1.35882	0.118076	210.338	2.1882	16.7713	0.374201
50	CKHFAW190471	4.27997	0.113915	70.3173	0.182399	0.913512	0.161354	3.18592	0.0675106	3.91085	0.160692	3.94153	0.106497	3.52174	0.198596	8.96476	0.646058	1.14968	0.0551682	9.0923	0.833562	1.96678	0.131698	1.40629	0.0862995	211.348	1.44501	16.8188	0.207315
51	CKHFAW190472	5.06003	0.352814	68.9234	0.48971	1.0254	0.216574	3.19383	0.109762	3.33867	0.179992	3.74902	0.128946	3.3434	0.200473	7.25734	0.912875	1.00097	0.0674756	8.76789	1.56985	1.77756	0.173653	1.42932	0.118077	211.639	2.20787	16.6442	0.374273
52	CKHFAW190474	5.84499	0.113839	69.958	0.18217	1.19912	0.161354	3.09189	0.0675058	3.45441	0.160657	4.12106	0.106492	4.04857	0.198539	5.88414	0.646058	0.977967	0.0551682	10.8642	0.833553	1.70797	0.131703	1.30391	0.0862967	218.475	1.44655	17.2365	0.207291
53	CKHFAW190477	5.37766	0.35259	70.721	0.488089	1.47236	0.216574	2.95803	0.109699	3.85697	0.180072	4.26063	0.128963	3.70045	0.200379	7.61106	0.912875	0.981152	0.0674756	8.53804	1.56984	1.84137	0.17365	1.49043	0.118074	213.184	2.18846	16.6909	0.37413
54	CKHFAW190481	5.79905	0.352191	69.4078	0.487866	1.81074	0.216574	3.10548	0.109705	3.57291	0.179992	4.27764	0.129002	3.68579	0.20033	6.68234	0.912875	0.905648	0.0674756	8.65888	1.56983	1.76206	0.173649	1.4553	0.118077	213.371	2.19045	16.6556	0.374208
55	CKHFAW190489	5.36945	0.113871	69.4366	0.182154	1.38111	0.161354	3.08511	0.0675054	3.67746	0.160663	4.24491	0.10651	3.93494	0.198611	7.5099	0.646058	0.965714	0.0551682	7.86057	0.833572	2.05207	0.131697	1.37784	0.0862957	216.113	1.44877	16.6901	0.207302
56	CKHFAW190490	5.08678	0.352677	69.2141	0.488303	1.17661	0.216574	3.15657	0.109682	3.58872	0.179975	4.31073	0.128814	3.69701	0.200336	7.08504	0.912875	1.0592	0.0674756	8.84827	1.56983	1.89237	0.173651	1.41656	0.118077	214.332	2.19605	16.5555	0.374145
57	CKHFAW190496	5.23938	0.352759	72.0345	0.488713	1.25707	0.216574	2.94714	0.109743	3.59637	0.180035	4.02726	0.129058	3.4126	0.200405	7.44066	0.912875	0.929021	0.0674756	9.22977	1.56983	1.91535	0.173649	1.4499	0.118079	217.584	2.19541	17.1043	0.374273
58	CKHFAW190498	5.45144	0.352708	71.5127	0.488822	1.46247	0.216574	3.25489	0.109745	3.71088	0.179939	3.95419	0.12887	3.34241	0.200326	6.06862	0.912875	1.05467	0.0674756	9.2833	1.56981	1.75063	0.173646	1.35754	0.118076	222.948	2.19576	16.5886	0.374228
59	CKHFAW190499	5.74024	0.353843	71.4626	0.488086	1.05236	0.216574	3.19493	0.109688	3.50675	0.180045	3.94892	0.128898	3.52427	0.200392	5.90621	0.912875	1.17944	0.0674756	10.8225	1.56982	1.5536	0.173639	1.30976	0.118072	224.266	2.18461	16.6907	0.374233
60	CKHFAW190507	3.96367	0.353002	72.8448	0.487313	0.649615	0.216574	3.40167	0.109699	3.45358	0.179947	4.43404	0.128745	3.96454	0.200355	6.71724	0.912875	1.06579	0.0674756	8.21333	1.56981	1.80844	0.173644	1.42916	0.118073	207.169	2.18648	15.6918	0.374123
61	CKHFAW190519	5.58704	0.113872	71.0289	0.182025	0.973493	0.161354	2.89798	0.0675005	3.9426	0.16065	4.22307	0.106368	3.47162	0.19852	4.19409	0.646058	1.00525	0.0551682	7.97088	0.833554	1.49666	0.131691	1.25656	0.0862951	207.577	1.4439	17.4704	0.2073
62	CKHFAW190521	5.74761	0.352642	71.8994	0.488589	1.39108	0.216574	2.95368	0.109684	3.64284	0.17996	4.20649	0.128943	3.48701	0.200353	4.73274	0.912875	0.971079	0.0674756	7.46675	1.56984	1.55316	0.173647	1.57976	0.118074	212.578	2.18995	17.3234	0.374245
63	CKHFAW190529	5.86932	0.113845	69.5532	0.182198	1.36908	0.161354	3.01137	0.0674952	3.75841	0.160689	4.42375	0.106387	3.94254	0.198583	6.73262	0.646058	0.96291	0.0551682	10.2286	0.833566	1.75643	0.131702	1.39905	0.0862945	215.536	1.4459	16.4676	0.207299
64	CKHFAW190541	4.59481	0.352633	66.9055	0.487498	1.84208	0.216574	3.09661	0.109686	3.74775	0.179933	4.24338	0.128815	3.50277	0.200332	4.28272	0.912875	1.03583	0.0674756	7.75263	1.56983	1.78817	0.173644	1.46537	0.118076	213.597	2.18651	16.3605	0.374257
65	CKHFAW190548	5.46079	0.352088	67.7239	0.486777	1.52611	0.216574	2.78386	0.109641	3.59552	0.179996	4.32264	0.128725	4.26972	0.200374	9.85956	0.912875	1.11481	0.0674756	9.27043	1.56984	1.7763	0.173645	1.5686	0.11807	214.709	2.18309	16.643	0.374178
66	CKHFAW190552	5.50058	0.11389	67.2468	0.182246	1.00844	0.161354	2.91921	0.0675169	3.69161	0.160785	4.1088	0.106449	4.04623	0.198604	9.43745	0.646058	0.974479	0.0551682	9.50568	0.833578	1.61899	0.131696	1.30834	0.0862978	221.01	1.44525	16.3384	0.207308
67	CKHFAW200001	6.5846	0.139078	72.5841	0.260726	1.06306	0.213386	2.60801	0.080163	3.58988	0.200122	3.96741	0.133457	3.50953	0.334413	5.63493	0.984817	1.00782	0.0711532	9.33887	0.912637	1.6131	0.142432	1.29175	0.0992009	222.754	2.46154	17.2669	0.228912
68	CKHFAW200023	6.16715	0.139003	71.341	0.260717	0.704623	0.213386	2.77343	0.0800962	3.58185	0.200198	3.94576	0.133536	3.52506	0.334426	4.82001	0.984817	1.00375	0.0711532	6.85466	0.912617	1.81285	0.142431	1.22047	0.0992009	222.777	2.46156	17.006	0.228916
69	CKHFAW200026	6.306	0.139121	70.5169	0.261204	1.14854	0.213386	2.64017	0.0801738	3.43423	0.200061	4.00996	0.133664	3.54787	0.334428	6.79121	0.984817	1.07967	0.0711532	6.83234	0.912635	1.63688	0.142433	1.27747	0.0992066	221.117	2.46541	16.966	0.228927
70	CKHFAW200031	6.3471	0.139068	71.2204	0.26523	1.21842	0.213386	2.75787	0.0801558	3.8258	0.200275	4.08853	0.133688	3.60387	0.334426	4.59429	0.984817	1.02224	0.0711532	7.16732	0.912643	1.61223	0.142431	1.26667	0.0992027	213.964	2.46375	16.7667	0.228921
71	CKHFAW200034	6.35902	0.13908	71.2194	0.260935	1.08598	0.213386	2.83819	0.0801315	3.64561	0.200112	3.93428	0.133776	3.54027	0.334438	4.36216	0.984817	0.868458	0.0711532	8.11013	0.912639	1.70469	0.14243	1.42371	0.0992055	212.401	2.46713	17.0552	0.228941
72	CKHFAW200036	6.17069	0.13913	71.1462	0.260912	0.925488	0.213386	2.81697	0.0802184	3.57919	0.20013	4.27736	0.13354	3.58054	0.33442	5.55506	0.984817	0.971028	0.0711532	8.05943	0.912661	2.05233	0.142438	1.27159	0.0992073	217.155	2.4634	17.7732	0.228916
73	CKHFAW200049	6.1187	0.139073	70.8784	0.261095	1.21678	0.213386	2.75201	0.0801512	3.56465	0.20009	4.30515	0.134022	3.58008	0.334442	5.69181	0.984817	0.943135	0.0711532	6.12067	0.91262	1.69106	0.142434	1.33858	0.0992094	209.31	2.46902	17.1052	0.228935
74	CKHFAW200050	5.83766	0.139108	71.7455	0.261168	1.38371	0.213386	2.82845	0.0801545	3.52747	0.200286	3.96504	0.133437	3.61099	0.334413	5.00193	0.984817	1.12679	0.0711532	8.61653	0.912624	1.58637	0.142429	1.18921	0.0991976	212.714	2.46175	17.1791	0.228908
75	CKIR06001	4.21568	0.352265	69.8854	0.488496	1.6531	0.216574	3.20077	0.109701	3.67035	0.18002	3.99724	0.128967	3.14806	0.200391	7.56396	0.912875	0.833625	0.0674756	8.61547	1.56983	1.92059	0.173645	1.49091	0.118074	208.677	2.19067	16.5315	0.374189
76	DK777	6.15809	0.113859	69.3272	0.182388	0.428927	0.161354	2.77072	0.0675024	3.6826	0.160738	4.00339	0.106422	3.69452	0.198583	6.89543	0.646058	1.02895	0.0551682	6.54492	0.833555	1.97609	0.131704	1.39196	0.0862932	213.147	1.44789	16.8028	0.207303
77	Duma 43	4.59908	0.113849	65.1218	0.182138	2.04471	0.161354	3.09894	0.0674984	3.82552	0.160651	4.49909	0.106505	4.03679	0.19854	9.1273	0.646058	0.793343	0.0551682	12.8561	0.833558	1.56005	0.131698	1.70793	0.0862963	212.132	1.44715	15.6368	0.207292
78	PHB30G19	4.70082	0.352579	70.3537	0.487664	2.0515	0.216574	2.97311	0.109693	3.86116	0.179955	4.51758	0.128852	4.18494	0.200351	4.112	0.912875	0.767025	0.0674756	8.18474	1.56983	1.55552	0.173645	1.15688	0.118074	219.656	2.18843	17.5171	0.374127
79	WE3106	5.98385	0.139084	70.5226	0.260872	1.15565	0.213386	2.87752	0.0801403	3.80239	0.200288	4.16253	0.133652	3.51439	0.334434	7.57818	0.984817	0.90751	0.0711532	9.61054	0.912637	1.68988	0.142432	1.44412	0.0992042	226.733	2.46508	17.0442	0.228921
80	CKH191219	5.31434	0.367429	67.5923	0.545962	1.24798	0.268757	2.87883	0.119483	3.32601	0.200378	3.80754	0.142353	3.19514	0.25944	8.14653	0.921921	1.01345	0.0978933	8.25988	1.90355	1.76252	0.173644	1.28577	0.118371	196.748	2.2787	16.7304	0.418098
81	CKH191220	5.11015	0.368508	68.2058	0.547426	1.17802	0.268757	2.94941	0.119565	3.51039	0.200358	3.93627	0.142275	3.44268	0.25937	8.00494	0.921921	0.948681	0.0978933	9.4821	1.90356	1.76069	0.173651	1.36352	0.118375	196.115	2.28466	16.6051	0.418144
82	CKH191257	5.55323	0.367093	71.2952	0.546327	1.57272	0.268757	2.62759	0.119486	3.48443	0.200407	3.78796	0.142456	3.36831	0.259388	11.4611	0.921921	1.0143	0.0978933	8.00153	1.90356	1.62991	0.173648	1.51617	0.118375	225.628	2.27836	16.2722	0.418112
83	CKH191274	5.43985	0.368491	70.8339	0.547547	0.881623	0.268757	2.97926	0.119573	3.6935	0.200383	4.14428	0.142414	3.73222	0.259382	9.4418	0.921921	0.943363	0.0978933	8.33436	1.90354	1.85885	0.173647	1.47785	0.118375	213.127	2.28748	16.5008	0.418142
84	CKH191275	5.48738	0.367853	71.4248	0.546384	0.539924	0.268757	2.78722	0.119533	3.37297	0.200378	4.18039	0.142292	3.70994	0.259343	7.49316	0.921921	0.978545	0.0978933	9.29957	1.90355	1.97884	0.173647	1.5281	0.118373	220.136	2.28148	16.3229	0.418174
